# Supplementary material for: Deletion of bone marrow myeloperoxidase attenuates chronic kidney disease accelerated atherosclerosis
Source: PubMed Central journal article supplement (PMC7948401; doi:10.1074/jbc.ra120.014095), 2020-12-03
Supplement: mmc1.pdf [file mmc1.pdf]

## Supporting Information

### Deletion of bone marrow myeloperoxidase attenuates chronic kidney disease accelerated atherosclerosis

Anna V. Mathew<sup>1\*</sup>, Lixia Zeng<sup>1</sup>, Kevin B. Atkins<sup>1</sup>, Kiana N. Sadri<sup>1</sup>, Jaeman Byun<sup>1</sup>, Hideaki Fujiwara<sup>2</sup>,  
Pavan Reddy<sup>2</sup>, and Subramaniam Pennathur<sup>1,3\*</sup>

<sup>1</sup>Department of Medicine, Division of Nephrology; <sup>2</sup>Department of Medicine, Division of Hematology-Oncology; <sup>3</sup>Department of Molecular and Integrative Physiology; University of Michigan, Ann Arbor, MI, 48105

\*Corresponding authors: Subramaniam Pennathur or Anna V. Mathew

Email: [spennath@umich.edu](mailto:spennath@umich.edu) or [amat@umich.edu](mailto:amat@umich.edu)

#### Contents:

**Figure S1.** Creation of chimeric bone marrow MPO deficiency CKD model.

**Figure S2.** Bone marrow MPO deficiency in 5/6 nephrectomized mice on a high-fat/ high- cholesterol diet decreases MPO expression in atherosclerotic lesions.

**Figure S3.** Bone marrow MPO deficiency decreases in MPO oxidative products in atherosclerotic lesions in 5/6 nephrectomized mice.

**Figure S4.** Bone marrow MPO deficiency decreases atherosclerosis in 5/6 nephrectomized mice.

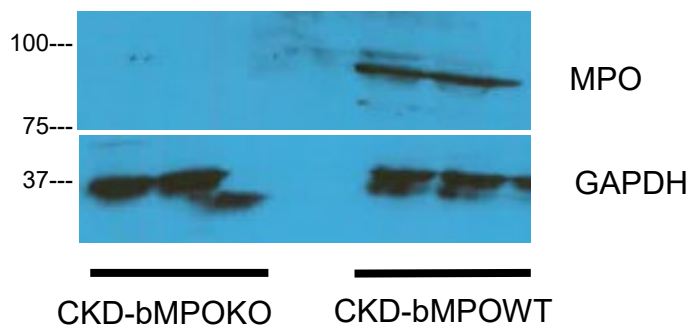

**Figure S1.** Creation of chimeric bone marrow MPO deficiency CKD model. Immunoblot of bone marrow tissue from irradiated mice with 5/6 nephrectomy (CKD mice) transplanted with bone marrow from MPO knockout mice (CKD-bMPOKO) or WT mice (CKD-bMPOWT). Anti-MPO antibodies (MPO) and anti-glyceraldehyde 3 phosphate dehydrogenase antibodies (GAPDH, loading control) confirmed the absence of MPO in the bone marrow of CKD-bMPOKO mice.

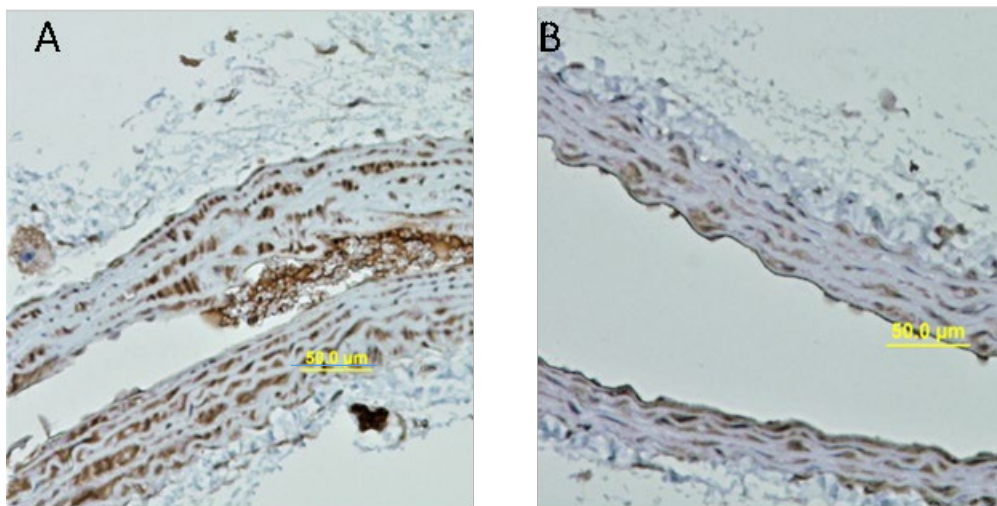

**Figure S2.** Bone marrow MPO deficiency in 5/6 nephrectomized mice on a high-fat/ high- cholesterol diet decreases MPO expression in atherosclerotic lesions. Representative immunohistologic staining for MPO in aortic cross-sections from CKD mice after 16 weeks on a high-fat/high-cholesterol diet. Intense staining for MPO was observed in the intimal lesions of irradiated, 5/6 nephrectomized mice with WT bone marrow (CKD-bMPOWT, **A**) as compared with mice with MPO-knockout bone marrow (CKD-bMPOKO, **B**). Bars represent 50μm; Original Magnification x20.

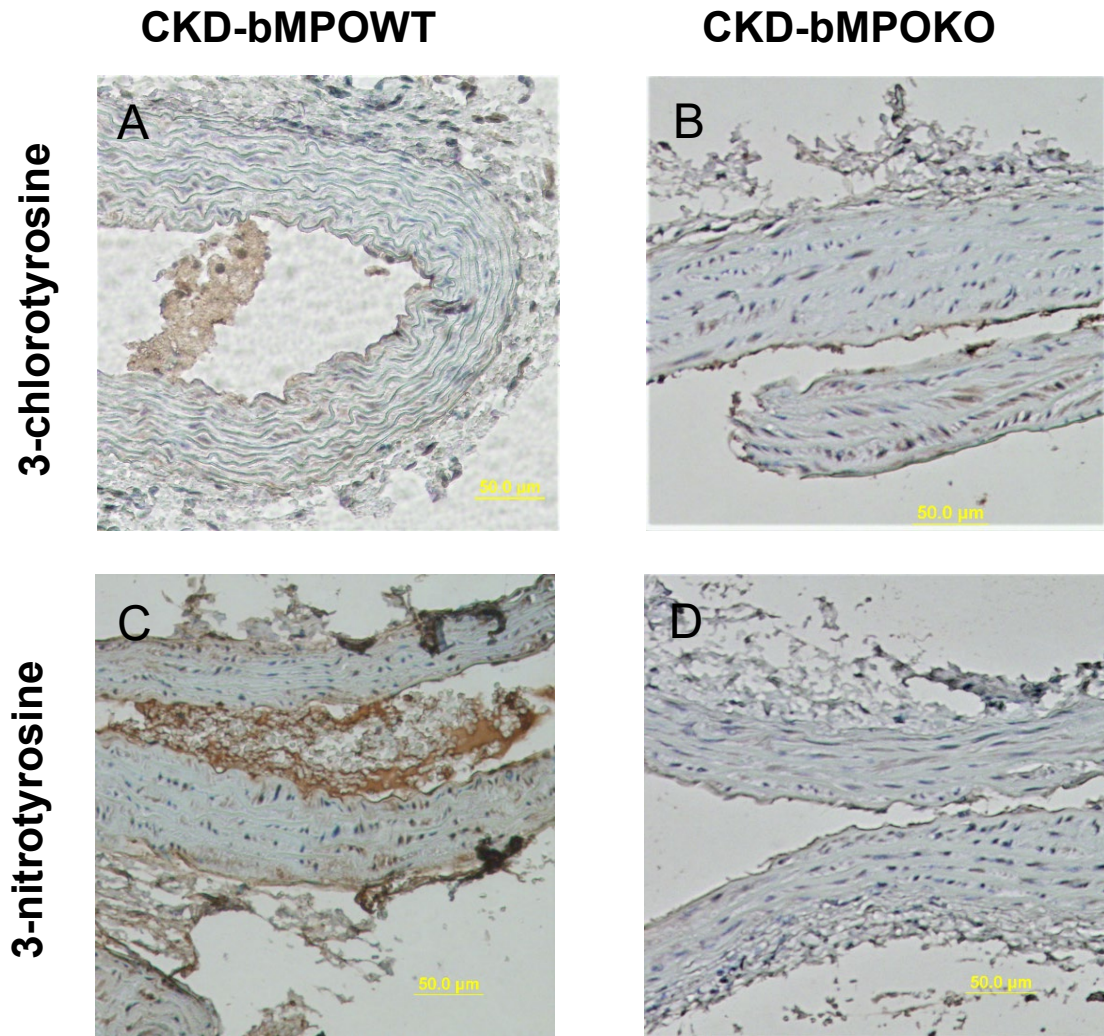

**Figure S3.** Bone marrow MPO deficiency decreases in MPO oxidative products in atherosclerotic lesions in 5/6 nephrectomized mice. Representative immunohistologic staining for 3-chlorotyrosine (**A, B**) and 3-nitrotyrosine (**C, D**) in aortic cross-sections of mice fed a high-fat/ high- cholesterol diet for 16 weeks. **A and C.** Irradiated CKD mice with WT marrow (CKD-bMPOWT). **B, and D.** Irradiated CKD mice with MPO knockout bone marrow (CKD-bMPOKO). Magnification 20x. Please note intense staining for 3-chlorotyrosine and 3-nitrotyrosine in atherosclerotic intimal lesions of the CKD-bMPOWT mice on a high-fat/ high- cholesterol diet for 16 weeks as compared with age-matched CKD-bMPOKO mice. Bars represent 50µm; Original Magnification x20.

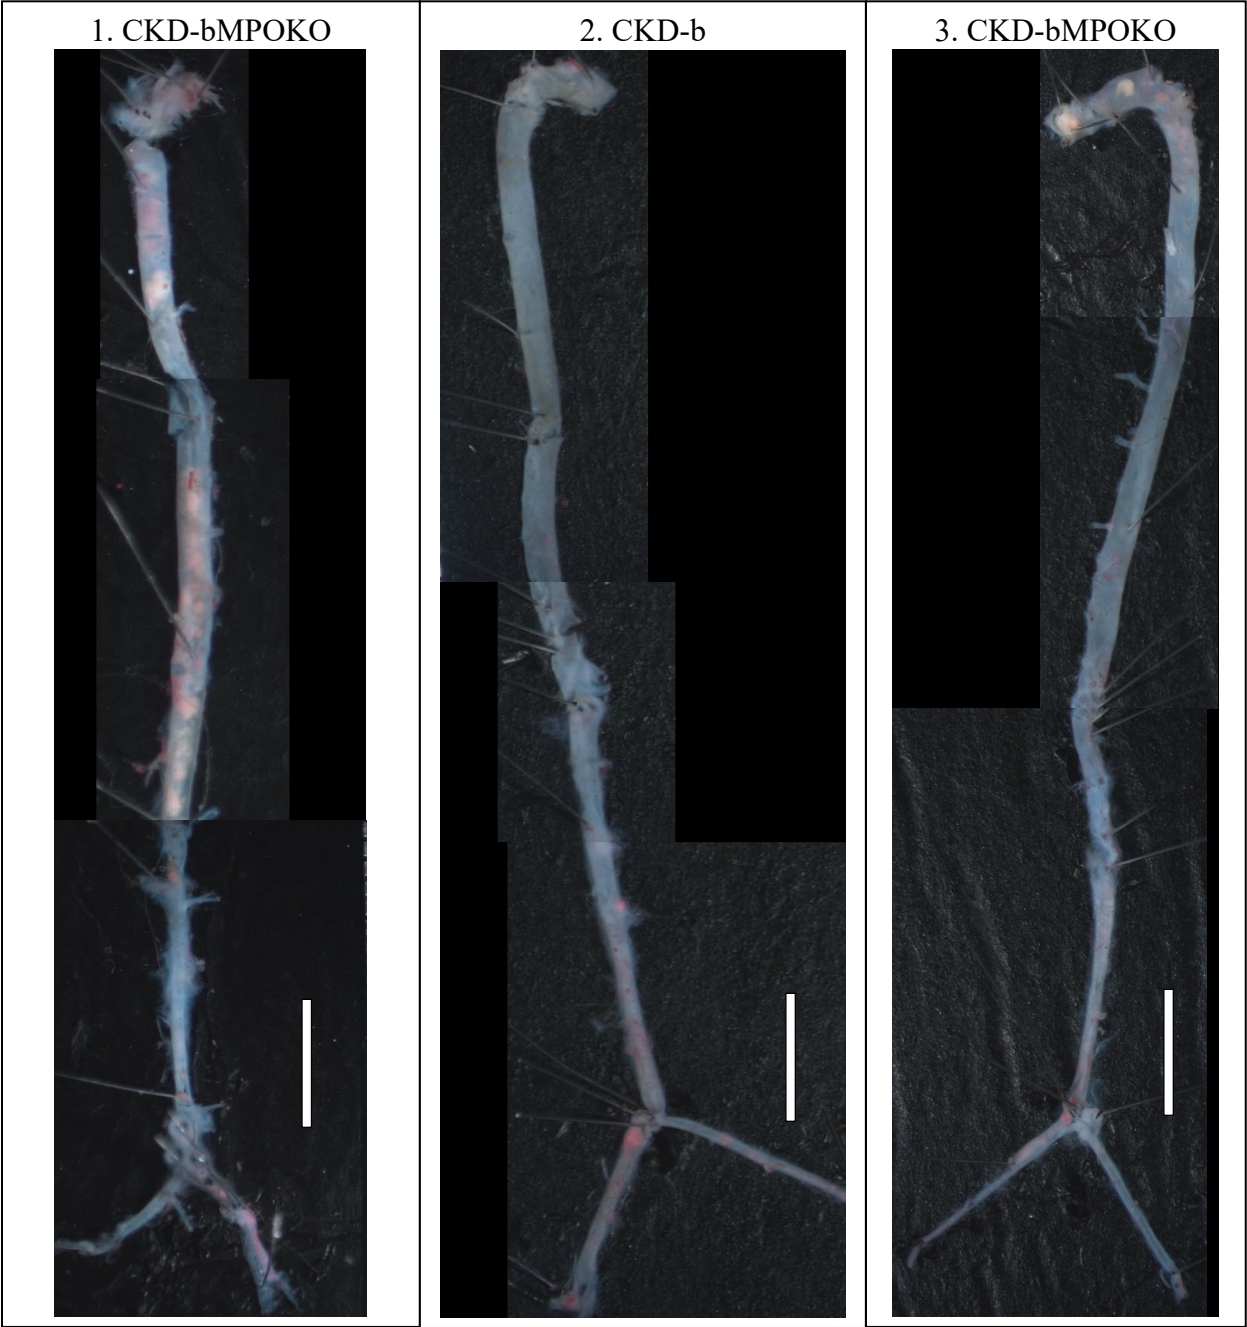



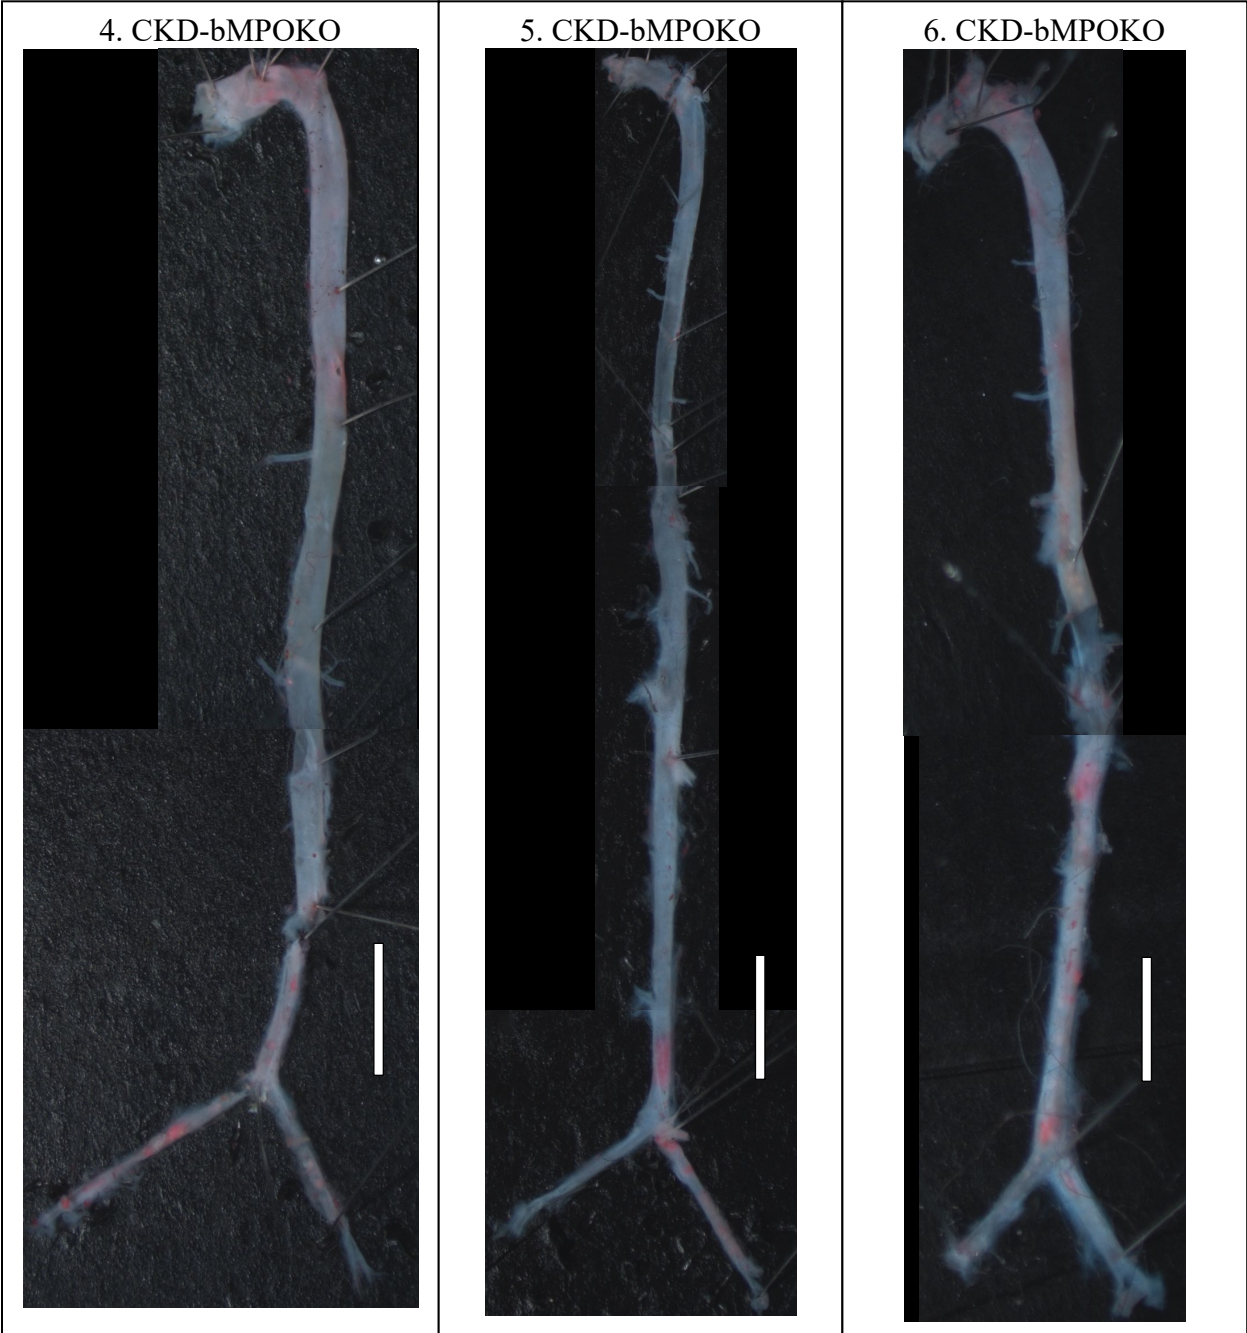

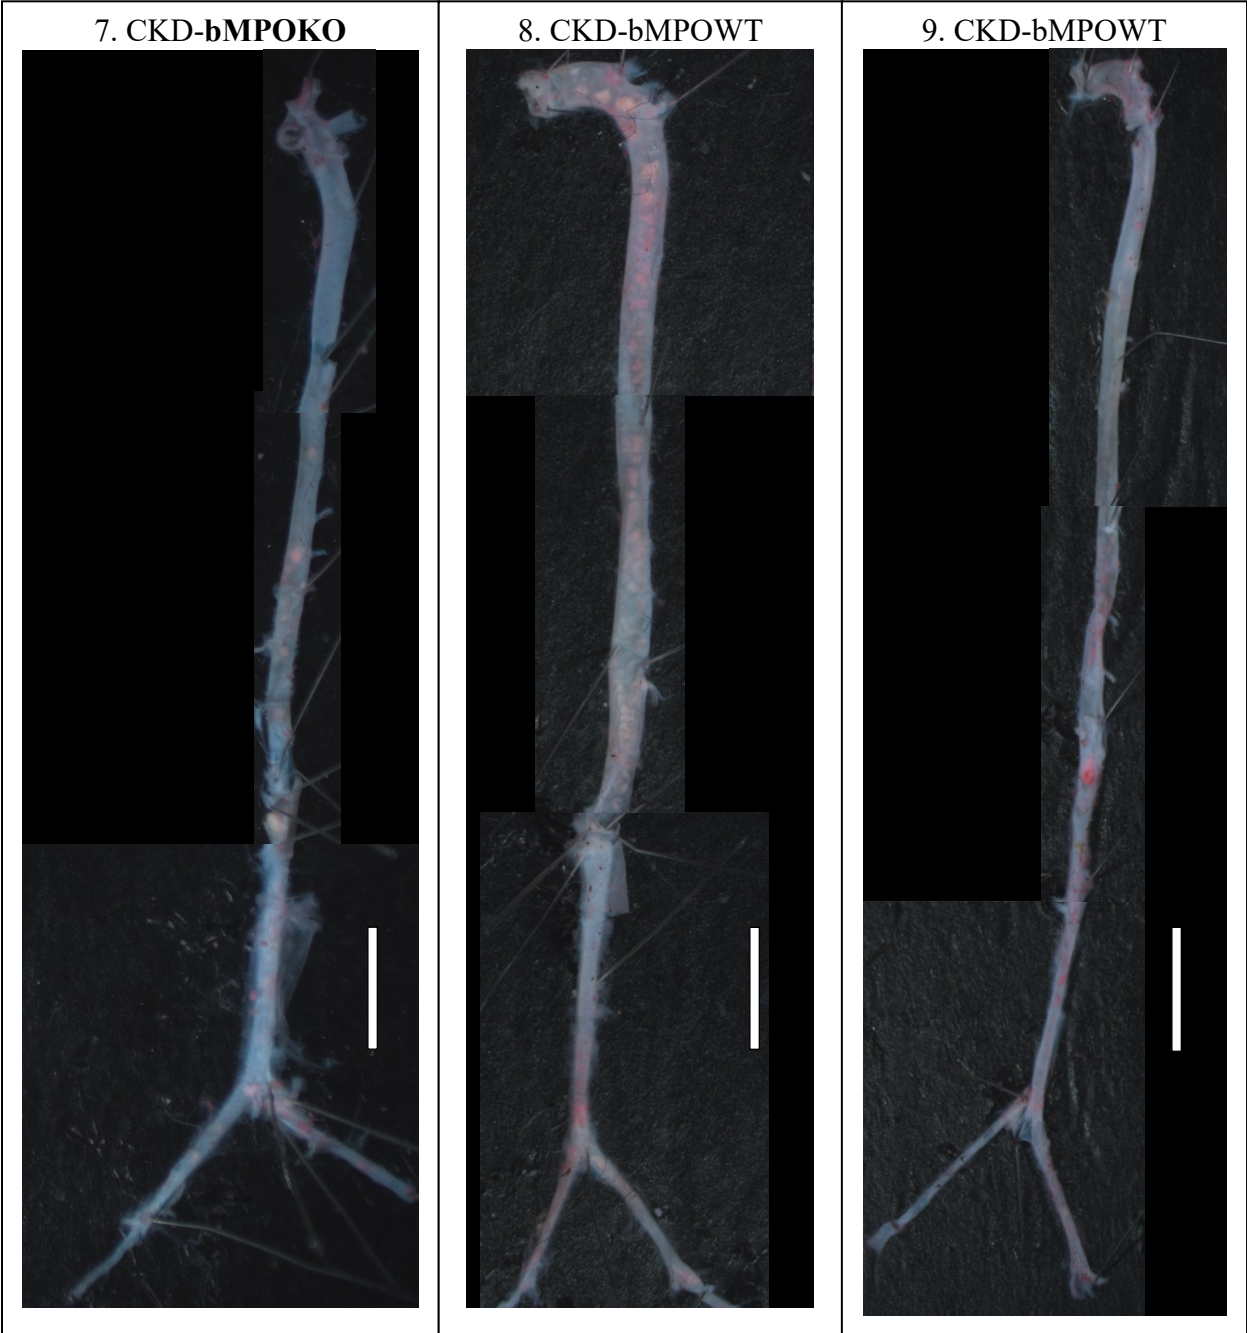

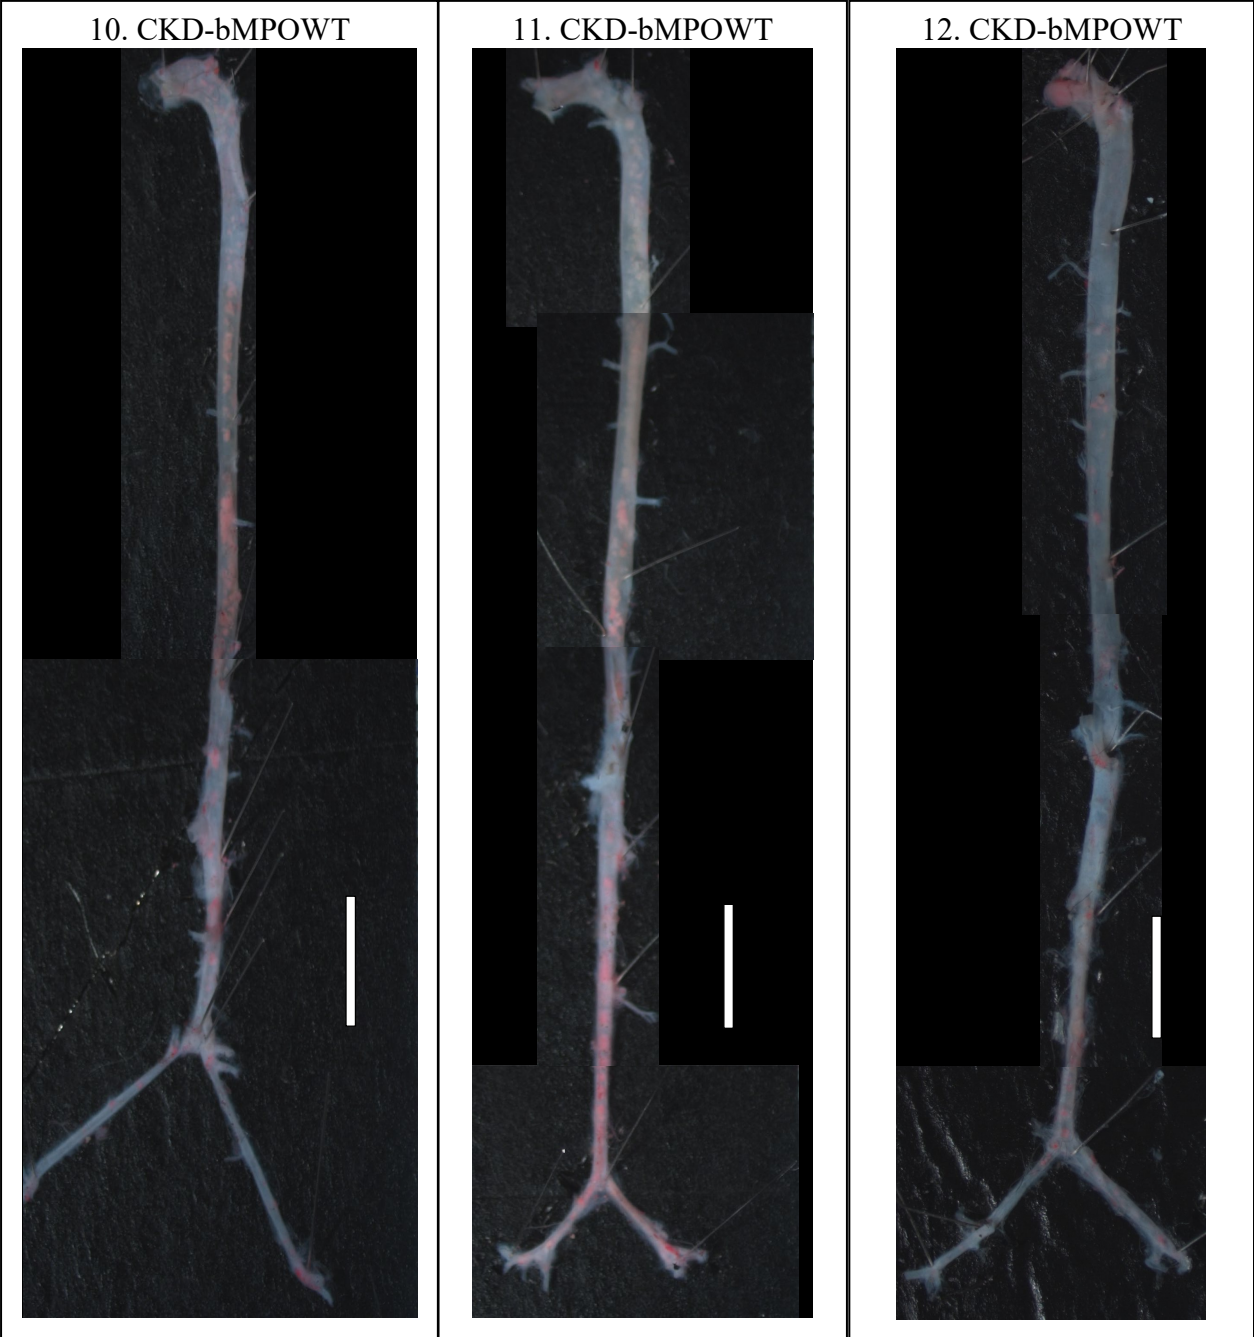



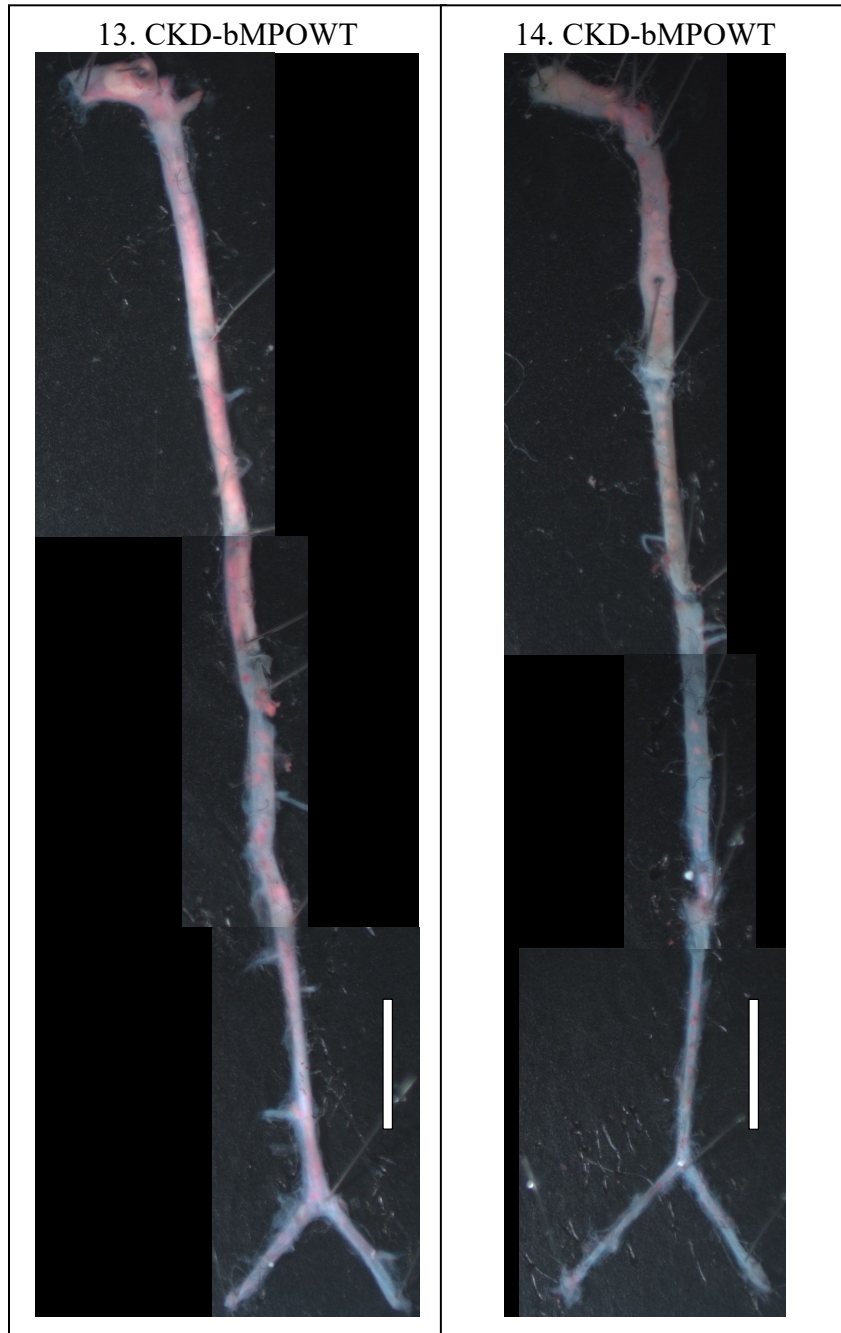

**Figure S4.** Bone marrow MPO deficiency decreases atherosclerosis in 5/6 nephrectomized mice.

Oil red staining of *en face* aorta from irradiated 5/6 nephrectomized LDLr<sup>-/-</sup> mice (CKD) after 16 weeks on a high-fat/ high- cholesterol diet represented by composite images. **Panels 1-7.** CKD mice with bone marrow MPO deficiency (CKD-bMPOKO). **Panels 8-14.** CKD mice with WT bone marrow (CKD-bMPOWT). Original Magnification x6.3. Scale bar represents 5mm.
